# Supplementary material for: The Protein Composition Changed the Quality Characteristics of Plant-Based Meat Analogues Produced by a Single-Screw Extruder: Four Main Soybean Varieties in China as Representatives
Source: MDPI journal article supplement (doi:10.3390/foods11081112), 2022-04-13
Supplement: s1 [file s1]

**Table S1 The amino acid composition of four kinds of plant-based meat analogues (PBMs) (%)**

|               | Heihe 43    | Jiyu 86     | Suinong 52  | Shengfeng 5 |
|---------------|-------------|-------------|-------------|-------------|
| Threonine     | 4.43±0.03a  | 4.48±0.02a  | 4.89±0.02b  | 5.12±0.02c  |
| Valine        | 5.18±0.01a  | 5.08±0.08b  | 5.32±0.09c  | 5.63±0.09s  |
| Methionine    | 1.11±0.02a  | 1.00±0.01b  | 1.19±0.01c  | 1.24±0.01d  |
| Isoleucine    | 4.88±0.01a  | 4.61±0.03b  | 4.85±0.01c  | 4.96±0.01d  |
| Leucine       | 8.72±0.02a  | 8.50±0.06b  | 8.99±0.00c  | 9.07±0.01d  |
| Phenylalanine | 6.79±0.00a  | 6.40±0.02b  | 6.54±0.01c  | 6.80±0.03a  |
| Lysine        | 7.07±0.01b  | 7.10±0.02a  | 6.65±0.01b  | 6.84±0.01c  |
| Aspartate     | 11.88±0.02a | 11.84±0.02a | 11.61±0.02b | 11.52±0.01c |
| Serine        | 5.93±0.04a  | 5.74±0.01b  | 5.92±0.03a  | 5.66±0.03c  |
| Glutamate     | 19.71±0.00a | 19.54±0.04b | 20.08±0.02c | 19.45±0.00d |
| Glycine       | 4.24±0.01a  | 4.35±0.02b  | 3.98±0.02c  | 4.30±0.00d  |
| Alanine       | 4.16±0.02a  | 4.28±0.01b  | 4.39±0.03c  | 4.64±0.01d  |
| Tyrosine      | 2.53±0.01a  | 2.53±0.10a  | 2.88±0.05b  | 2.50±0.03a  |
| Histidine     | 2.67±0.05a  | 2.84±0.05b  | 2.44±0.01c  | 2.46±0.01c  |
| Arginine      | 7.16±0.03a  | 7.31±0.02b  | 7.36±0.02c  | 7.35±0.02c  |
| Proline       | 3.54±0.00a  | 4.40±0.01b  | 2.90±0.06c  | 2.46±0.02d  |

Different lowercase letters indicate a significant difference ( $p < 0.05$ )

**Table S2 Volatile flavor compounds of the PBM produced by Heihe 43**

| No. | Relative content (%) | Components                                                                              | Molecular weight | CAS          |
|-----|----------------------|-----------------------------------------------------------------------------------------|------------------|--------------|
| 1   | 1.15                 | dl-Alanine ethyl ester                                                                  | 117.079          | 017344-99-9  |
| 2   | 0.70                 | Ethyl 8-p-[[[diethylsulfamyl]phenethyl]amino]-3-methylpyrido[2,3-b]pyrazine-6-carbamate | 486.205          | 021271-98-7  |
| 3   | 1.68                 | 2-Hexanone, 4-methyl-                                                                   | 114.104          | 000105-42-0  |
| 4   | 1.35                 | Acetic acid                                                                             | 60.021           | 000064-19-7  |
| 5   | 2.18                 | Pentanal                                                                                | 86.073           | 000110-62-3  |
| 6   | 0.77                 | Toluene                                                                                 | 92.063           | 000108-88-3  |
| 7   | 11.94                | Hexanal                                                                                 | 100.089          | 000066-25-1  |
| 8   | 0.73                 | 2-Heptanone                                                                             | 114.104          | 000110-43-0  |
| 9   | 1.04                 | 3,3,3-Trifluoro-N-(2-fluorophenyl)-2-(trifluoromethyl)propionamide                      | 289.034          | 304444-11-9  |
| 10  | 9.13                 | 2-Heptenal, (E)-                                                                        | 112.089          | 018829-55-5  |
| 11  | 2.53                 | Benzaldehyde                                                                            | 106.042          | 000100-52-7  |
| 12  | 1.94                 | Hexanoic acid                                                                           | 116.084          | 000142-62-1  |
| 13  | 1.12                 | N-[5-(Trifluoromethyl)-1,3,4-thiadiazol-2-yl]benzamide                                  | 273.018          | 054047-24-4  |
| 14  | 10.65                | 1-Octen-3-ol                                                                            | 128.12           | 003391-86-4  |
| 15  | 1.25                 | 3,4-Dinitrobenzonitrile                                                                 | 193.012          | 004248-33-3  |
| 16  | 1.50                 | Furan, 2-pentyl-                                                                        | 138.104          | 003777-69-3  |
| 17  | 1.24                 | 4-Piperidinecarboxamide                                                                 | 128.095          | 039546-32-2  |
| 18  | 2.12                 | 1,4-Pentadiene                                                                          | 68.063           | 000591-93-5  |
| 19  | 1.02                 | Hexenal, 2-ethyl-                                                                       | 126.104          | 026266-68-2  |
| 20  | 2.03                 | 2-Tridecenal, (E)-                                                                      | 196.183          | 007069-41-2  |
| 21  | 2.94                 | 2-Decen-1-ol, (E)-                                                                      | 156.151          | 018409-18-2  |
| 22  | 1.56                 | 1-Propene, 1-chloro-2-methyl-                                                           | 90.024           | 000513-37-1  |
| 23  | 1.25                 | Furan, 4-methyl-2-propyl-                                                               | 124.089          | 006148-37-4  |
| 24  | 0.89                 | Anthiaergostan-5,7,9,22-tetraen, 15-[2,4-dinitrophenylazo]-                             | 572.336          | 1000213-78-6 |
| 25  | 1.88                 | Butane, 2-chloro-                                                                       | 92.039           | 000078-86-4  |
| 26  | 3.31                 | Maltol                                                                                  | 126.032          | 000118-71-8  |
| 27  | 1.16                 | 3-Fluoro-4-nitrotoluene                                                                 | 155.038          | 000446-34-4  |
| 28  | 0.64                 | 2H-Pyran, 2-(2,5-hexadiynyloxy)tetrahydro-                                              | 178.099          | 040924-58-1  |
| 29  | 1.07                 | Pentanol, 5-amino-                                                                      | 103.1            | 002508-29-4  |
| 30  | 2.62                 | Nonadecane                                                                              | 268.313          | 000629-92-5  |
| 31  | 0.92                 | 5H-Cyclohepta-1,4-dioxin, 2,3,4a,6,7,9a-hexahydro-, cis-                                | 154.099          | 055956-39-3  |
| 32  | 1.09                 | 4-t-Butyl-2-[3,4-dichlorophenyl]-6-pyrroloidinylmethyl phenol                           | 377.131          | 1000227-33-2 |
| 33  | 1.74                 | 1-Chloroeicosane                                                                        | 316.29           | 042217-02-7  |
| 34  | 3.94                 | 2,4-Decadienal, (E,E)-                                                                  | 152.12           | 025152-84-5  |
| 35  | 0.66                 | (4Z)-5-Chloro-3,4-dimethyl-2,4-heptadiene                                               | 158.086          | 105949-75-5  |

|    |      |                                                           |         |              |
|----|------|-----------------------------------------------------------|---------|--------------|
| 36 | 0.81 | tert-Butyl N-(4-nitrophenyl)carbamate                     | 238.095 | 018437-63-3  |
| 37 | 1.18 | Acetamide, 2-chloro-N,N-di-2-propenyl-                    | 173.061 | 000093-71-0  |
| 38 | 1.25 | Cycloheptane, methoxy-                                    | 128.12  | 042604-04-6  |
| 39 | 7.95 | 4H-Pyrazole, 3-tert-butylsulfanyl-4,4-bistrifluoromethyl- | 292.047 | 1000303-59-8 |
| 40 | 1.06 | 17-Bromopregnane-3,20-dione                               | 394.151 | 062973-42-6  |
| 41 | 0.85 | 2-(4-Chloro-phenoxy)-nicotinic acid                       | 249.019 | 1000296-88-9 |
| 42 | 0.79 | Benzene, 1-azido-4-nitro-                                 | 164.033 | 001516-60-5  |
| 43 | 2.94 | Myo-Inositol, 4-C-methyl-                                 | 194.079 | 000472-95-7  |
| 44 | 0.73 | Furfurylideniminosulphur pentafluoride                    | 220.993 | 090598-15-5  |
| 45 | 0.69 | Biphenyl, 2,2',4,5',6-pentabromo-                         | 543.631 | 059080-39-6  |

---

**Table S3 Volatile flavor compounds of the PBM produced by Jiyu 86**

| No. | Relative content (%) | Components                                                                                      | Molecular weight | CAS         |
|-----|----------------------|-------------------------------------------------------------------------------------------------|------------------|-------------|
| 1   | 1.34                 | dl-Alanine ethyl ester                                                                          | 117.079          | 017344-99-9 |
| 2   | 0.52                 | Cystine                                                                                         | 240.024          | 000056-89-3 |
| 3   | 0.56                 | Ethyl 8-p-<br>[[[diethylsulfamyl]phenethyl]amino]-<br>3-methylpyrido[2,3-b]pyrazine-6-carbamate | 486.205          | 021271-98-7 |
| 4   | 1.28                 | 1,3-Propanediamine, N,N,2-trimethyl-N'-(4-nitrophenyl)-                                         | 237.148          | 055667-52-2 |
| 5   | 1.24                 | Acetic acid                                                                                     | 60.021           | 000064-19-7 |
| 6   | 0.33                 | 2-Butenal                                                                                       | 70.042           | 004170-30-3 |
| 7   | 2.15                 | Pentanal                                                                                        | 86.073           | 000110-62-3 |
| 8   | 0.74                 | Butanoic acid, 3-oxo-, 2,2,2-trichloroethyl ester                                               | 231.946          | 058547-15-2 |
| 9   | 0.49                 | 2H-Pyran, 4-chlorotetrahydro-                                                                   | 120.034          | 001768-64-5 |
| 10  | 0.98                 | Spiro[2.4]hepta-4,6-diene                                                                       | 92.063           | 000765-46-8 |
| 11  | 10.69                | Hexanal                                                                                         | 100.089          | 000066-25-1 |
| 12  | 0.51                 | 2-Butenediamide, 2-methyl-, (Z)-                                                                | 128.059          | 041138-17-4 |
| 13  | 0.50                 | 2H-Pyran, 2-(2,5-hexadiynyloxy)tetrahydro-                                                      | 178.099          | 040924-58-1 |
| 14  | 0.43                 | 1-Acrylonitril-3,3,-dimethyldiaziridine                                                         | 123.08           | 077376-92-2 |
| 15  | 0.32                 | 1,3-Cyclopentadiene, 5-(1-methylethylidene)-                                                    | 106.078          | 002175-91-9 |
| 16  | 0.73                 | 2H-Pyran, 3,4-dihydro-2-methoxy-                                                                | 114.068          | 004454-05-1 |
| 17  | 0.43                 | 1-(Prop-2-ynyl)-3,3-bis(trifluoromethyl)diaziridine                                             | 218.028          | 083391-92-8 |
| 18  | 1.07                 | 1,9-Diaminononane                                                                               | 158.178          | 000646-24-2 |
| 19  | 14.26                | 2-Heptenal, (E)-                                                                                | 112.089          | 018829-55-5 |
| 20  | 4.07                 | Benzaldehyde                                                                                    | 106.042          | 000100-52-7 |
| 21  | 9.27                 | 1-Nonen-3-ol                                                                                    | 142.136          | 021964-44-3 |
| 22  | 2.33                 | 2-n-Butyl furan                                                                                 | 124.089          | 004466-24-4 |
| 23  | 0.88                 | Benzene, 1,3,5-trimethyl-                                                                       | 120.094          | 000108-67-8 |
| 24  | 1.58                 | Octanal                                                                                         | 128.12           | 000124-13-0 |
| 25  | 0.98                 | Cyclobutane, (1-methylethylidene)-                                                              | 96.094           | 001528-22-9 |
| 26  | 0.40                 | Chloromethylphosphonic dichloride                                                               | 165.891          | 001983-26-2 |
| 27  | 1.85                 | 4-Nonyne                                                                                        | 124.125          | 020184-91-2 |
| 28  | 1.05                 | 3-Hepten-2-one, 3-methyl-                                                                       | 126.104          | 039899-08-6 |
| 29  | 2.93                 | 1,2,4-Benzothiadiazine, 7-chloro-1,1-dioxide-4-methyl-3-(4-methyl-1-piperazinyl)-               | 328.076          | 070443-35-5 |
| 30  | 3.48                 | 2-Decen-1-ol                                                                                    | 156.151          | 022104-80-9 |
| 31  | 1.11                 | 3,5-Octadien-2-one                                                                              | 124.089          | 038284-27-4 |
| 32  | 1.28                 | Heptadecane                                                                                     | 240.282          | 000629-78-7 |
| 33  | 3.22                 | Nonanal                                                                                         | 142.136          | 000124-19-6 |

|    |      |                                                                  |         |             |
|----|------|------------------------------------------------------------------|---------|-------------|
| 34 | 3.97 | Maltol                                                           | 126.032 | 000118-71-8 |
| 35 | 1.84 | Benzoic acid, 2,5-bis(trimethylsiloxy)-,<br>trimethylsilyl ester | 370.145 | 003618-20-0 |
| 36 | 1.09 | 3-Amino-2-cyclohexenone                                          | 111.068 | 005220-49-5 |
| 37 | 0.52 | (4Z)-5-Chloro-3,4-dimethyl-2,4-heptadiene                        | 158.086 | 105949-75-5 |
| 38 | 0.83 | Pyridazine, 3,6-dichloro-                                        | 147.96  | 000141-30-0 |
| 39 | 0.42 | Tetryl                                                           | 287.014 | 000479-45-8 |
| 40 | 2.73 | Dodecane                                                         | 170.203 | 000112-40-3 |
| 41 | 2.94 | Cycloheptane                                                     | 98.11   | 000291-64-5 |
| 42 | 1.61 | Tridecane                                                        | 184.219 | 000629-50-5 |
| 43 | 8.16 | 2,4-Decadienal                                                   | 152.12  | 002363-88-4 |
| 44 | 0.58 | 1-Benzyl-2,3,3-trimethyldiaziridine                              | 176.131 | 077671-19-3 |
| 45 | 1.01 | Butylated Hydroxytoluene                                         | 220.183 | 000128-37-0 |
| 46 | 0.33 | Acetic acid, dichloro-, ethyl ester                              | 155.974 | 000535-15-9 |
| 47 | 0.45 | 2-Butanol, 1-[(2-hydroxyethyl)thio]-                             | 150.071 | 021428-94-4 |
| 48 | 0.53 | 1-Propanol, 3-(methylthio)-                                      | 106.045 | 000505-10-2 |

---

**Table S4 Volatile flavor compounds of the PBM produced by Suinong 52**

| No. | Relative content (%) | Components                                                                                        | Molecular weight | CAS          |
|-----|----------------------|---------------------------------------------------------------------------------------------------|------------------|--------------|
| 1   | 0.62                 | Glycyl-dl-alanine                                                                                 | 146.069          | 000926-77-2  |
| 2   | 0.81                 | (S)-(+)-1,2-Propanediol                                                                           | 76.052           | 004254-15-3  |
| 3   | 3.03                 | Acetic acid                                                                                       | 60.021           | 000064-19-7  |
| 4   | 1.47                 | Pentanal                                                                                          | 86.073           | 000110-62-3  |
| 5   | 0.71                 | But-2-enamide, N,N-diundecyl-3-methyl-                                                            | 407.413          | 1000308-24-5 |
| 6   | 1.21                 | Toluene                                                                                           | 92.063           | 000108-88-3  |
| 7   | 7.49                 | Hexanal                                                                                           | 100.089          | 000066-25-1  |
| 8   | 0.57                 | 3,3,3-Trifluoro-N-(4-fluorophenyl)-2-(trifluoromethyl)propionamide                                | 289.034          | 340138-04-7  |
| 9   | 1.10                 | Carbonic acid, dimethyl ester                                                                     | 90.032           | 000616-38-6  |
| 10  | 0.57                 | Cyclopropanecarboxylic acid, 2,3-dichlorophenyl ester                                             | 229.99           | 1000278-66-6 |
| 11  | 0.70                 | Bis[1-[2-(2-pyridyl)ethyl]-2-methylbenzimidazol-5-yl] sulfone                                     | 536.199          | 1000253-88-6 |
| 12  | 0.63                 | 2-Hexanone, 4-methyl-                                                                             | 114.104          | 000105-42-0  |
| 13  | 0.98                 | 2-Chloroethyl 1-propynyl sulfoxide                                                                | 149.991          | 1000250-50-5 |
| 14  | 0.81                 | Pentane, 3-ethyl-2-methyl-                                                                        | 114.141          | 000609-26-7  |
| 15  | 12.59                | 2-Heptenal, (Z)-                                                                                  | 112.089          | 057266-86-1  |
| 16  | 4.10                 | Benzaldehyde                                                                                      | 106.042          | 000100-52-7  |
| 17  | 1.26                 | 1,6-Anhydro-.beta.-D-glucopyranose (levoglucosan)                                                 | 162.053          | 000498-07-7  |
| 18  | 0.99                 | 5H-Indeno[1,2-b]pyrazin-5-one, 6,7,8-tribromo-9-(ethoxycarbonyl)-N,N'-diethyl-1,2,3,4-tetrahydro- | 547.895          | 1000149-89-3 |
| 19  | 8.48                 | 1-Octen-3-ol                                                                                      | 128.12           | 003391-86-4  |
| 20  | 1.15                 | 2,3-Octanedione                                                                                   | 142.099          | 000585-25-1  |
| 21  | 1.87                 | 2,4-Nonadienal, (E,E)-                                                                            | 138.104          | 005910-87-2  |
| 22  | 1.07                 | Cyclopropane,-1-ethenyloxy,-2,2-dichloro                                                          | 151.98           | 042039-18-9  |
| 23  | 0.93                 | Cyclobut-1-enylmethanol                                                                           | 84.058           | 089182-08-1  |
| 24  | 1.36                 | 1-Ethyl-5-methylcyclopentene                                                                      | 110.11           | 097797-57-4  |
| 25  | 1.92                 | Limonene                                                                                          | 136.125          | 000138-86-3  |
| 26  | 0.79                 | Cyclohexanebutanoic acid, 2-methyl-3-oxo-, methyl ester                                           | 212.141          | 083406-43-3  |
| 27  | 2.66                 | 6-Methoxy-3-(4-methylpiperazine-1-carbonyl)-chromen-2-one                                         | 302.127          | 325471-63-4  |
| 28  | 2.05                 | 2-Hepten-1-ol, (Z)-                                                                               | 114.104          | 055454-22-3  |
| 29  | 0.94                 | Cyclohexanone, 2-(2-propenyl)-                                                                    | 138.104          | 000094-66-6  |
| 30  | 0.95                 | Bicyclo[2.2.1]heptane, 2-(2-methyl-1-propenyl)-                                                   | 150.141          | 061142-27-6  |
| 31  | 1.07                 | 2,6-Dimethyldecane                                                                                | 170.203          | 013150-81-7  |
| 32  | 2.87                 | Nonanal                                                                                           | 142.136          | 000124-19-6  |
| 33  | 4.81                 | Maltol                                                                                            | 126.032          | 000118-71-8  |
| 34  | 0.96                 | Pyrazole-5-carboxamide, 4-amino-                                                                  | 126.054          | 1000273-71-8 |

|    |      |                                                 |         |              |
|----|------|-------------------------------------------------|---------|--------------|
| 35 | 0.65 | Sulfurous acid, diethyl ester                   | 138.035 | 000623-81-4  |
| 36 | 1.81 | Z,Z-3,13-Octadecadien-1-ol                      | 266.261 | 1000131-10-7 |
| 37 | 2.74 | Dodecane                                        | 170.203 | 000112-40-3  |
| 38 | 0.64 | Pentane, 1-nitro-                               | 117.079 | 000628-05-7  |
| 39 | 0.77 | Propyl 2-ethylbutanoate                         | 158.131 | 005129-46-4  |
| 40 | 2.22 | Oleic Acid                                      | 282.256 | 000112-80-1  |
| 41 | 1.41 | Cyclohexane, 1,4-dichloro-, trans-              | 152.016 | 016890-91-8  |
| 42 | 1.66 | Eicosane                                        | 282.329 | 000112-95-8  |
| 43 | 9.05 | 2,4-Decadienal                                  | 152.12  | 002363-88-4  |
| 44 | 0.62 | Pipridine, 1-chloroacetyl-                      | 161.061 | 001440-60-4  |
| 45 | 0.56 | 2,4(1H,3H)-Pyrimidinedione, 6-chloro-5-nitro-   | 190.973 | 006630-30-4  |
| 46 | 1.33 | Tridecane                                       | 184.219 | 000629-50-5  |
| 47 | 0.69 | Propanamide, 2,2-dimethyl-N-(2,4-diiodophenyl)- | 428.909 | 1000266-63-5 |
| 48 | 1.40 | 4,6-di-tert-Butyl-m-cresol                      | 220.183 | 000497-39-2  |
| 49 | 0.94 | Cyclohexanol, 2-(aminomethyl)-, trans-          | 129.115 | 005691-09-8  |

---

**Table S5 Volatile flavor compounds of the PBM produced by Shengfeng 5**

| No. | Relative content (%) | Components                                                                                | Molecular weight | CAS         |
|-----|----------------------|-------------------------------------------------------------------------------------------|------------------|-------------|
| 1   | 0.59                 | Urea, N,N'-diethyl-                                                                       | 116.095          | 000623-76-7 |
| 2   | 0.82                 | 1-Butaneboronic acid                                                                      | 102.085          | 004426-47-5 |
| 3   | 1.54                 | 1-Propanol, 3-chloro-                                                                     | 94.019           | 000627-30-5 |
| 4   | 1.64                 | Acetic acid                                                                               | 60.021           | 000064-19-7 |
| 5   | 1.64                 | Benzeneethanamine, 3-benzyloxy-2-fluoro-.beta.-hydroxy-N-methyl-                          | 275.132          | 103439-01-6 |
| 6   | 0.54                 | 1-Benzyl-4-nitroimidazole                                                                 | 203.069          | 013230-13-2 |
| 7   | 0.92                 | Pyridine-3-carboxamide, 1,2-dihydro-4,6-dimethyl-2-thioxo-                                | 182.051          | 079927-21-2 |
| 8   | 0.60                 | Toluene                                                                                   | 92.063           | 000108-88-3 |
| 9   | 11.90                | Hexanal                                                                                   | 100.089          | 000066-25-1 |
| 10  | 0.73                 | 2,5-Furandione, dihydro-3-methylene-                                                      | 112.016          | 002170-03-8 |
| 11  | 0.66                 | 4,5-Thiepanedione, 3,3,6,6-tetramethyl-                                                   | 200.087          | 002800-87-5 |
| 12  | 0.88                 | Methanaminium, 1-carboxy-N,N,N-trimethyl-, hydroxide, inner salt                          | 117.079          | 000107-43-7 |
| 13  | 1.06                 | 3,4,5,6-Tetrahydro-2,4,6-trimethyl-2H-1,3,5-thiadiazine                                   | 146.088          | 053897-63-5 |
| 14  | 14.00                | 2-Heptenal, (Z)-                                                                          | 112.089          | 057266-86-1 |
| 15  | 2.30                 | Benzaldehyde                                                                              | 106.042          | 000100-52-7 |
| 16  | 0.78                 | Heptanoic acid                                                                            | 130.099          | 000111-14-8 |
| 17  | 8.07                 | 1-Octen-3-ol                                                                              | 128.12           | 003391-86-4 |
| 18  | 1.63                 | Furan, 2-pentyl-                                                                          | 138.104          | 003777-69-3 |
| 19  | 0.76                 | Benzene, 1,2,4-trimethyl-                                                                 | 120.094          | 000095-63-6 |
| 20  | 0.63                 | 2-(Chloromethyl)-5-oxo-1,2-oxaphospholane 2-oxide                                         | 167.974          | 022793-96-0 |
| 21  | 1.77                 | 4-(4-Methylaminobutyl)-5-(4-nitrophenyl)-2-(2-piperidino-1-(4-chlorophenyl)vinyl-thiazole | 510.186          | 155243-64-4 |
| 22  | 1.16                 | 3,5-Octadien-2-ol                                                                         | 126.104          | 069668-82-2 |
| 23  | 3.25                 | 5-Ethyl-1-nonene                                                                          | 154.172          | 019780-74-6 |
| 24  | 1.03                 | Cyclohexanone, 2-(1-mercapto-1-methylethyl)-5-methyl-                                     | 186.108          | 038462-22-5 |
| 25  | 1.22                 | Furan, 4-methyl-2-propyl-                                                                 | 124.089          | 006148-37-4 |
| 26  | 1.48                 | Nonadecane                                                                                | 268.313          | 000629-92-5 |
| 27  | 3.51                 | 2-Decen-1-ol, (E)-                                                                        | 156.151          | 018409-18-2 |
| 28  | 1.12                 | Maltol                                                                                    | 126.032          | 000118-71-8 |
| 29  | 0.52                 | 1,8-Nonadien-3-ol                                                                         | 140.12           | 159010-02-3 |
| 30  | 1.46                 | 1-Dodecene                                                                                | 168.188          | 000112-41-4 |
| 31  | 0.72                 | Benzofurazan, 5-nitro-                                                                    | 165.017          | 018772-11-7 |
| 32  | 0.63                 | Phenol, 2-chloro-                                                                         | 128.003          | 000095-57-8 |
| 33  | 4.19                 | Dodecane                                                                                  | 170.203          | 000112-40-3 |
| 34  | 0.88                 | 1,4-Cyclohexanedimethanamine                                                              | 142.147          | 002549-93-1 |
| 35  | 4.44                 | 2-Methylene cyclopentanol                                                                 | 98.073           | 020461-31-8 |



|    |      |                                                   |         |             |
|----|------|---------------------------------------------------|---------|-------------|
| 36 | 1.48 | 2,5,9-Tetradecatriene, 3,12-diethyl-              | 248.25  | 074685-87-3 |
| 37 | 3.44 | Hexadecane                                        | 226.266 | 000544-76-3 |
| 38 | 7.17 | 2,4-Decadienal                                    | 152.12  | 002363-88-4 |
| 39 | 0.90 | 1-Propene-1,2,3-tricarboxylic acid                | 174.016 | 000499-12-7 |
| 40 | 0.53 | 1,3-Bis(2-chloroethyl)urea                        | 184.017 | 002214-72-4 |
| 41 | 1.01 | Tetradecane                                       | 198.235 | 000629-59-4 |
| 42 | 1.05 | 2H-Pyran-5-carboxamide, 2-oxo-N-(3-chlorophenyl)- | 249.019 | 339241-73-5 |
| 43 | 0.93 | Procyazine                                        | 252.089 | 032889-48-8 |
| 44 | 3.08 | Butylated Hydroxytoluene                          | 220.183 | 000128-37-0 |
| 45 | 0.52 | 2H-Pyran, 2-(2,5-hexadiynyloxy)tetrahydro-        | 178.099 | 040924-58-1 |
| 46 | 0.80 | Propanenitrile, 3-chloro-                         | 89.003  | 000542-76-7 |

---
